# Supplementary material for: Anticancer potential of ethanolic sidr leaf extracts against MCF-7 breast cancer cells: phytochemical, nutritional, and antimicrobial profile comparisons of different plant parts
Source: PeerJ. 2025 Sep 26;13:e19858. doi: 10.7717/peerj.19858 (PMC12478309; doi:10.7717/peerj.19858)
Supplement: Supplemental Information 1 [file peerj-13-19858-s001.xlsx]

## Sheet: table-1
				Leaves
			% DW	R1	R2	R3
			Moisture	6.78	7.12	7.46
			Ash	7.84	8.17	8.5
			Ether	3.38	3.79	2.97
			Protien	11.98	12.44	12.9
			Fat	1.49	1.23	1.75
			Carbohydrate	69.29	70.88	72.47
			Fiber	13.24	14.1	14.96
				Pulps
			% DW	R1	R2	R3
			Moisture	12.25	11.78	12.72
			Ash	3.31	2.45	2.88
			Ether	0.52	0.6	0.68
			Protien	6.67	7.04	7.41
			Fat	0.37	0.55	0.46
			Carbohydrate	63.65	64.26	64.87
			Fiber	4.96	4.12	4.54
				Seeds
			% DW	R1	R2	R3
			Moisture	8.17	9.01	9.85
			Ash	0.4	0.46	0.34
			Ether	14.1	13.45	14.75
			Protien	6.57	6.99	7.41
			Fat	2.24	1.91	1.58
			Carbohydrate	79.46	81.69	83.92
			Fiber	47.98	50.46	49.22

## Sheet: table-2
				Leaves
			% DW	R1	R2	R3
			Ca	410.33	419.21	428.09
			P	199.92	195.17	190.42
			Na	55.76	59.89	64.02
			K	109.28	102.76	106.02
			Mg	140.65	145.78	150.91
			Zn	1.2	0.98	1.09
			Cu	0.45	0.37	0.41
			Mn	1.98	1.77	1.56
			Fe	40.83	38.02	35.21
			Cr	0.19	0.12	0.05
			B	0.55	0.47	0.51
				Pulps
			% DW	R1	R2	R3
			Ca	329.12	340.85	352.58
			P	138.55	134.56	142.54
			Na	128.45	138.49	133.47
			K	852.89	866.14	879.39
			Mg	79.53	74.87	77.2
			Zn	13.15	12.09	14.21
			Cu	1.02	1.26	1.14
			Mn	15.23	17.25	19.27
			Fe	9.11	11.85	10.48
			Cr	0.03	0.1	0.17
			B	1.11	1.67	1.39
				Seeds
			% DW	R1	R2	R3
			Ca	159.6	151.34	155.47
			P	195.34	213.6	204.47
			Na	160.11	165.78	154.44
			K	109.32	103.65	97.98
			Mg	36.28	43.76	40.02
			Zn	1.23	1.44	1.65
			Cu	0.97	1.11	1.04
			Mn	0.38	0.32	0.26
			Fe	16.96	22.6	19.78
			Cr	0.11	0.17	0.05
			B	0.18	0.26	0.22

## Sheet: table-3
				Leaves
				R1	R2	R3
			Total Chlorophyll (mg/g)	2.91	3.3	3.69
			Reducing Sugar (%)	2.56	2.98	2.77
			Starch (%)	4.88	4.47	5.29
			Ph	5.91	5.48	5.05
			TSS (Brix°)	0.83	1.13	0.98
			TA (%)	0.1	0.06	0.08
			Ascorbic Acid (mg/100 g)	40.32	43.24	41.78
				Pulps
				R1	R2	R3
			Total Chlorophyll (mg/g)	1.92	1.62	1.77
			Reducing Sugar (%)	43.11	44.25	45.39
			Starch (%)	16.59	15.64	17.54
			Ph	3.17	3.75	4.33
			TSS (Brix°)	10.97	12.35	11.66
			TA (%)	1.65	1.12	0.59
			Ascorbic Acid (mg/100 g)	19.98	18.06	19.02
				Seeds
				R1	R2	R3
			Total Chlorophyll (mg/g)	0	0	0
			Reducing Sugar (%)	31.32	29.14	26.96
			Starch (%)	3.45	4.51	3.98
			Ph	4.05	4.57	3.53
			TSS (Brix°)	4.58	4.05	3.52
			TA (%)	1.26	1.01	0.76
			Ascorbic Acid (mg/100 g)	6.98	6.08	6.53

## Sheet: table-4
				Leaves
				R1	R2	R3
			Sucrose	8.39	8.81	9.23
			Fructose	0.68	0.32	0.5
			Glucose	0.27	0.38	0.49
				Pulps
				R1	R2	R3
			Sucrose	43.87	41.22	38.57
			Fructose	21.23	25.11	23.17
			Glucose	27.64	26.08	24.52
				Seeds
				R1	R2	R3
			Sucrose	8.92	9.84	10.76
			Fructose	1.4	1.72	1.56
			Glucose	3.9	4.41	4.92

## Sheet: table-5
				Leaves
			Ethanolic Extract	R1	R2	R3
			Total Phenol (mg GAE/g)	13.59	12.74	11.89
			Total Flavonoid (mg QE/100 g)	109.68	113.62	111.65
			Antioxidant Activity DPPH (%)	83.49	80.65	77.81
			DPPH IC50 (mg/mL)	0.67	0.33	0.5
				Pulps
			Ethanolic Extract	R1	R2	R3
			Total Phenol (mg GAE/g)	19.21	23.87	21.54
			Total Flavonoid (mg QE/100 g)	174.11	178.45	182.79
			Antioxidant Activity DPPH (%)	40.55	43.64	37.46
			DPPH IC50 (mg/mL)	11.43	12.59	12.01
				Seeds
			Ethanolic Extract	R1	R2	R3
			Total Phenol (mg GAE/g)	18.14	17.32	16.5
			Total Flavonoid (mg QE/100 g)	170.56	165.72	168.14
			Antioxidant Activity DPPH (%)	34.15	35.89	37.63
			DPPH IC50 (mg/mL)	12.45	13.52	14.59

## Sheet: table-6
				Leaves
			Aqueous Extract	R1	R2	R3
			Total Phenol (mg GAE/g)	17.23	18.69	20.15
			Total Flavonoid (mg QE/100 g)	99.59	104.69	102.14
			Antioxidant Activity DPPH (%)	83.09	80.25	85.93
			DPPH IC50 (mg/mL)	0.17	0.11	0.05
				Pulps
			Aqueous Extract	R1	R2	R3
			Total Phenol (mg GAE/g)	42.78	45.01	47.24
			Total Flavonoid (mg QE/100 g)	160.12	167.04	163.58
			Antioxidant Activity DPPH (%)	69.26	64.24	66.75
			DPPH IC50 (mg/mL)	6.78	7.66	8.54
				Seeds
			Aqueous Extract	R1	R2	R3
			Total Phenol (mg GAE/g)	41.85	44.8	47.75
			Total Flavonoid (mg QE/100 g)	106.97	100.51	103.74
			Antioxidant Activity DPPH (%)	39.3	38.11	36.92
			DPPH IC50 (mg/mL)	13.69	13.02	12.35

## Sheet: fig 1
		Ethanolic Extract
				Leaves
				R1	R2	R3
		Staphylococcus aureus		22.31	21.47	20.63
		Escherichia coli		18.03	16.47	17.25
		Pseudomonas aeruginosa		13.21	12.23	14.19
		Bacillus subtilis		23.78	24.66	25.54
		Klebsiella pneumoniae		17.56	18.47	19.38
		Salmonella typhi		20.4	18.76	19.58
				Pulps
				R1	R2	R3
		Staphylococcus aureus		16.73	17.52	18.31
		Escherichia coli		13.06	12.24	11.42
		Pseudomonas aeruginosa		9.87	9.11	10.63
		Bacillus subtilis		18.43	19.26	20.09
		Klebsiella pneumoniae		14.17	12.23	13.2
		Salmonella typhi		14.5	13.69	12.88
				Seeds
				R1	R2	R3
		Staphylococcus aureus		14.17	12.39	13.28
		Escherichia coli		8.34	10.08	9.21
		Pseudomonas aeruginosa		7.15	6.43	7.87
		Bacillus subtilis		12.84	13.58	14.32
		Klebsiella pneumoniae		10.31	8.63	9.47
		Salmonella typhi		10.6	8.98	9.79

## Sheet: fig 2
		Aqueous Extract
				Leaves
				R1	R2	R3
		Staphylococcus aureus		16.97	13.31	15.14
		Escherichia coli		9.12	11.1	13.08
		Pseudomonas aeruginosa		9.45	11.23	7.67
		Bacillus subtilis		17.78	19.36	20.94
		Klebsiella pneumoniae		15.56	13.78	12
		Salmonella typhi		12.76	15.68	14.22
				Pulps
				R1	R2	R3
		Staphylococcus aureus		9.12	11.98	14.84
		Escherichia coli		6.98	12.12	9.55
		Pseudomonas aeruginosa		7.31	9.56	5.06
		Bacillus subtilis		16.77	14.02	11.27
		Klebsiella pneumoniae		9.77	7.43	12.11
		Salmonella typhi		7.65	12.11	9.88
				Seeds
				R1	R2	R3
		Staphylococcus aureus		7.13	9.02	10.91
		Escherichia coli		7.33	5.54	9.12
		Pseudomonas aeruginosa		2.11	5.93	4.02
		Bacillus subtilis		8.55	6.84	10.26
		Klebsiella pneumoniae		9.27	5.63	7.45
		Salmonella typhi		5.32	7.19	9.06

## Sheet: fig 3
		Cytotoxic Effect	Cell Viability (%)
		Sidr leaf extract (µg/mL)	R1	R2	R3
		Control	96.11	100	103.89
		((10))	88.77	81.45	85.11
		((25))	63.89	67.45	71.01
		((50))	44.89	40.57	49.21
		((100))	29.45	19.99	24.72

## Sheet: fig 4
		ROS Levels	ROS Levels (%)
		Sidr leaf extract (µg/mL)	R1	R2	R3
		Control	96.51	100	103.49
		((10))	107.43	115.07	111.25
		((25))	139.78	136.82	142.74
		((50))	195.56	199.54	203.52
		((100))	279.54	272.76	276.15
